# Supplementary material
Source: publisher site journal article supplement (https://www.dovepress.com/article/319933)
Supplement: Supplementary file 1 [file get_supplementary_file.php]

**Supplementary Table 1: Characteristics of patients with and without major adverse kidney endpoints at one year follow up(n=135)**

| **Parameter** | **NoCKD (n=70)** | **CKD/Death (n=65)** | **P-value** |
| --- | --- | --- | --- |
| **At hospitalisation for AKI** | | | |
| Age *†* | 44(35 ,55) | 58(47,67) | < 0.002 |
| Male Gender, n (%) | 40(57) | 38(59) | 0.508 |
| Base line creatinine (mg/dL) *†* | 0.8(0.7, 0.9) | 0.8 (0.8 ,0.1) | 0.202 |
| Baseline eGFR(ml/min/1,73m2) *±* | 99( 93 , 105) | 87 (82, 93) | 0.002 |
| Urea(mg/dL) *†* | 72 (34 ,115 ) | 60(28,111) | 0.249 |
| Peak creatinine during hospital stay(mg/dL) *†* | 3.2(1.80, 6.4) | 3.8(2.0, 7.8) | 0.241 |
| Haemoglobin (g/dL) *** | 11.4 (10.7, 12.0) | 10.3(9.7, 10.9) | 0.019 |
| AKI stage 3, n (%) | 38(54) | 39(60) | 0.154 |
| ICU admission, n (%) | 22 (31) | 32(49) | 0.022 |
| Renal replacement therapy, n (%) | 22(31) | 20(31) | 0. 934 |
| HAAKI, n (%) | 18(25) | 32(49.2) | 0.002 |
| Duration of hospital stay (days) *†* | 10(6,18) | 11(7,16) | 0.907 |
| Systemic hypertension n (%) | 6(9 ) | 17(26) | 0.006 |
| Diabetes mellitus n (%) | 3(4) | 19(29.2) | <0.001 |
| **Follow up** | | | |
| New onset albuminuria, n (%) | 0 | 05(8) | 0.024 |
| New onset hypertension/prehypertension, n (%) | 6 (9) | 2(3) | 0.277 |
| eGFR <60 at 2 weeks, n (%) | 20(29) | 53(81.5) | <0.001 |
| eGFR at two weeks (ml/min/1.73 m2) *** | 77.1 (70.5, 80.4) | 39.4( 33.9 , 44.9) | <0.001 |
| B2M/creat ratio at two weeks*†* | 4.3(1.1,23.4) | 32.7(13.4,100.6) | <0.001 |
| KIM/ creat ratio at two weeks*†* | 0.9(0.4,1.9) | 2.2 (0.8, 4..3) | 0.512 |
| Gap between diagnosis of AKI and first urine collection(days) *†* | 25 (21,33) | 26 (22, 31) | 0.919 |

*Footnote:* eGFR – estimated glomerular filtration rate, AKI- Hospital-acquired Acute Kidney injury, HAAKI- Hospital-acquired Acute Kidney injury, B2M/creat- Beta 2 microglobulin/creatinine, KIM/ creat- Kidney Injury Molecule -1

***Mean with 95% CI*, †* Median with IQR, RRT renal replacement therapy

*±*Baseline eGFR was available for only 75 patients; 36 in normal renal function and 39 with adverse kidney endpoints
